# Supplementary material for: PreS/2-21-Guided siRNA Nanoparticles Target to Inhibit Hepatitis B Virus Infection and Replication
Source: PubMed Central journal article supplement (PMC9098953; doi:10.3389/fimmu.2022.856463), 2022-04-29
Supplement: DataSheet_1.pdf [file DataSheet_1.pdf]

# Supplementary Information

## **PreS/2-21-guided siRNA Nanoparticles Target to Inhibit Hepatitis B Virus Infection and Replication**

Lixia Gao<sup>1†</sup>, Jie Yang<sup>1†</sup>, Jutao Feng<sup>2†</sup>, Ziyang Liu<sup>3</sup>, Ying Dong<sup>4</sup>, Jiangyan Luo<sup>1</sup>, Liangzhentian Yu<sup>1</sup>, Jiamei Wang<sup>1</sup>, Hongying Fan<sup>1</sup>, Weifeng Ma<sup>1\*</sup> and Tiancai Liu<sup>4\*</sup>

1 Department of Microbiology, School of Public Health, Southern Medical University, Guangzhou, 510515, PR China,

2 Department of Hepatobiliary Surgery, The First Affiliated Hospital of Guangzhou Medical University, Guangzhou, 510120, PR China,

3 State Key Laboratory of Organ Failure Research, Guangdong Provincial Key Laboratory of Viral Hepatitis Research, Department of Infectious Diseases, Nanfang Hospital, Southern Medical University, Guangzhou, 510515, PR China,

4 Institute of Antibody Engineering, School of Laboratory Medicine & Biotechnology, Southern Medical University, Guangzhou, 510515, PR China.

\*Corresponding Author: Tiancai Liu; Weifeng Ma

E-mail: [liutc@smu.edu.cn](mailto:liutc@smu.edu.cn); [mawEIFENG919@163.com](mailto:mawEIFENG919@163.com)

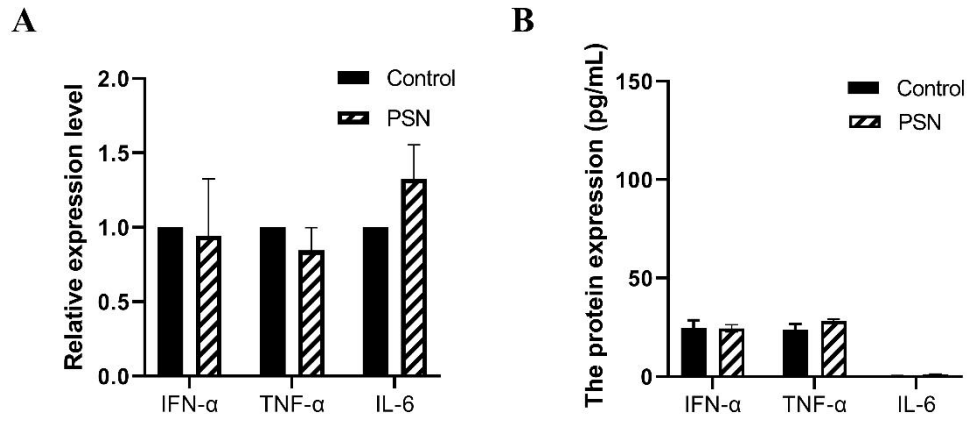

**Figure S1.** RT-qPCR (A) and ELISA tests (B) for the expression of cytokines IFN- $\alpha$ , TNF- $\alpha$ , and IL-6 in RAW264.7 cells after 25  $\mu$ g/mL PSN treatment. Data are represented as the mean  $\pm$  SD from at least three independent experiments.

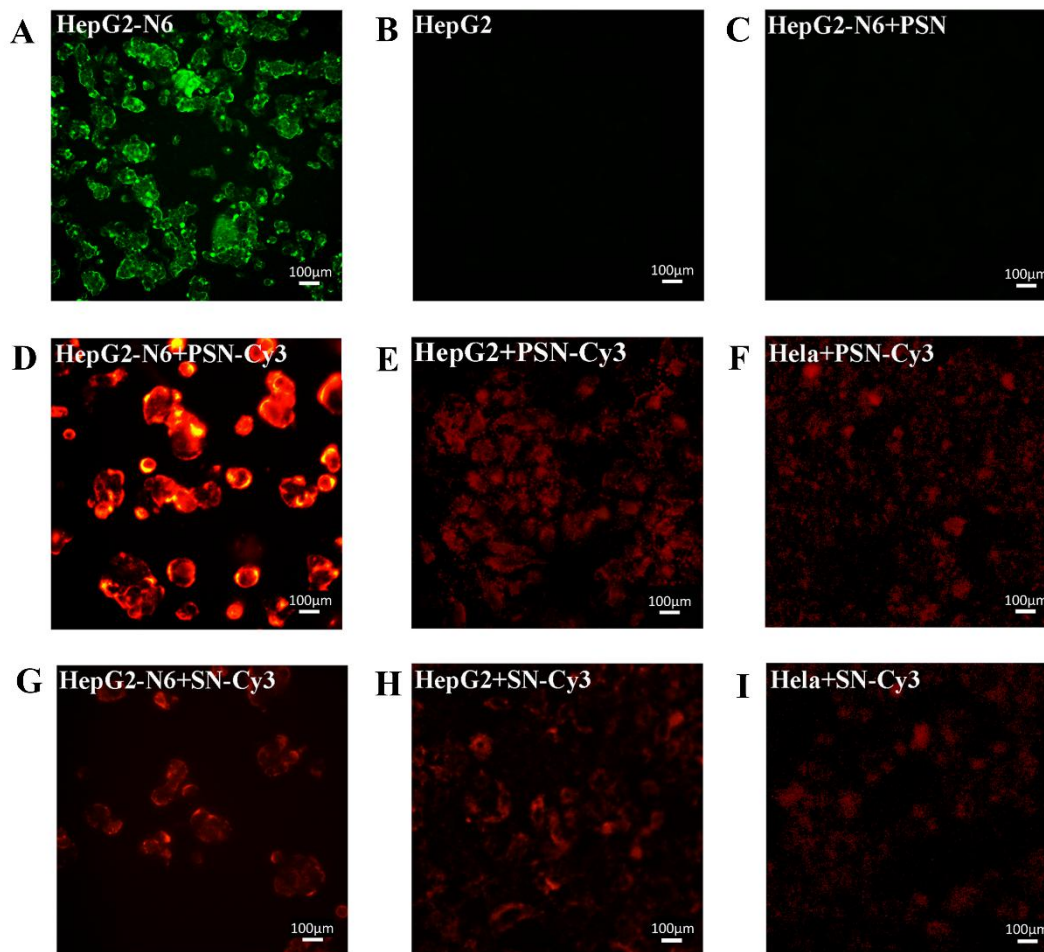

**Figure S2.** Targeting detection of liposome nanoparticles

(A-C). After NTCP-FITC antibody labeling, fluorescence microscopy detection of the expression of NTCP on cells and PSN competition for receptor binding; (D-I). Fluorescence microscopy detection of the targeting properties of siRNA-Cy3 loaded nanoparticles PSN and SN to HepG2-N6, HepG2 and HeLa cells.

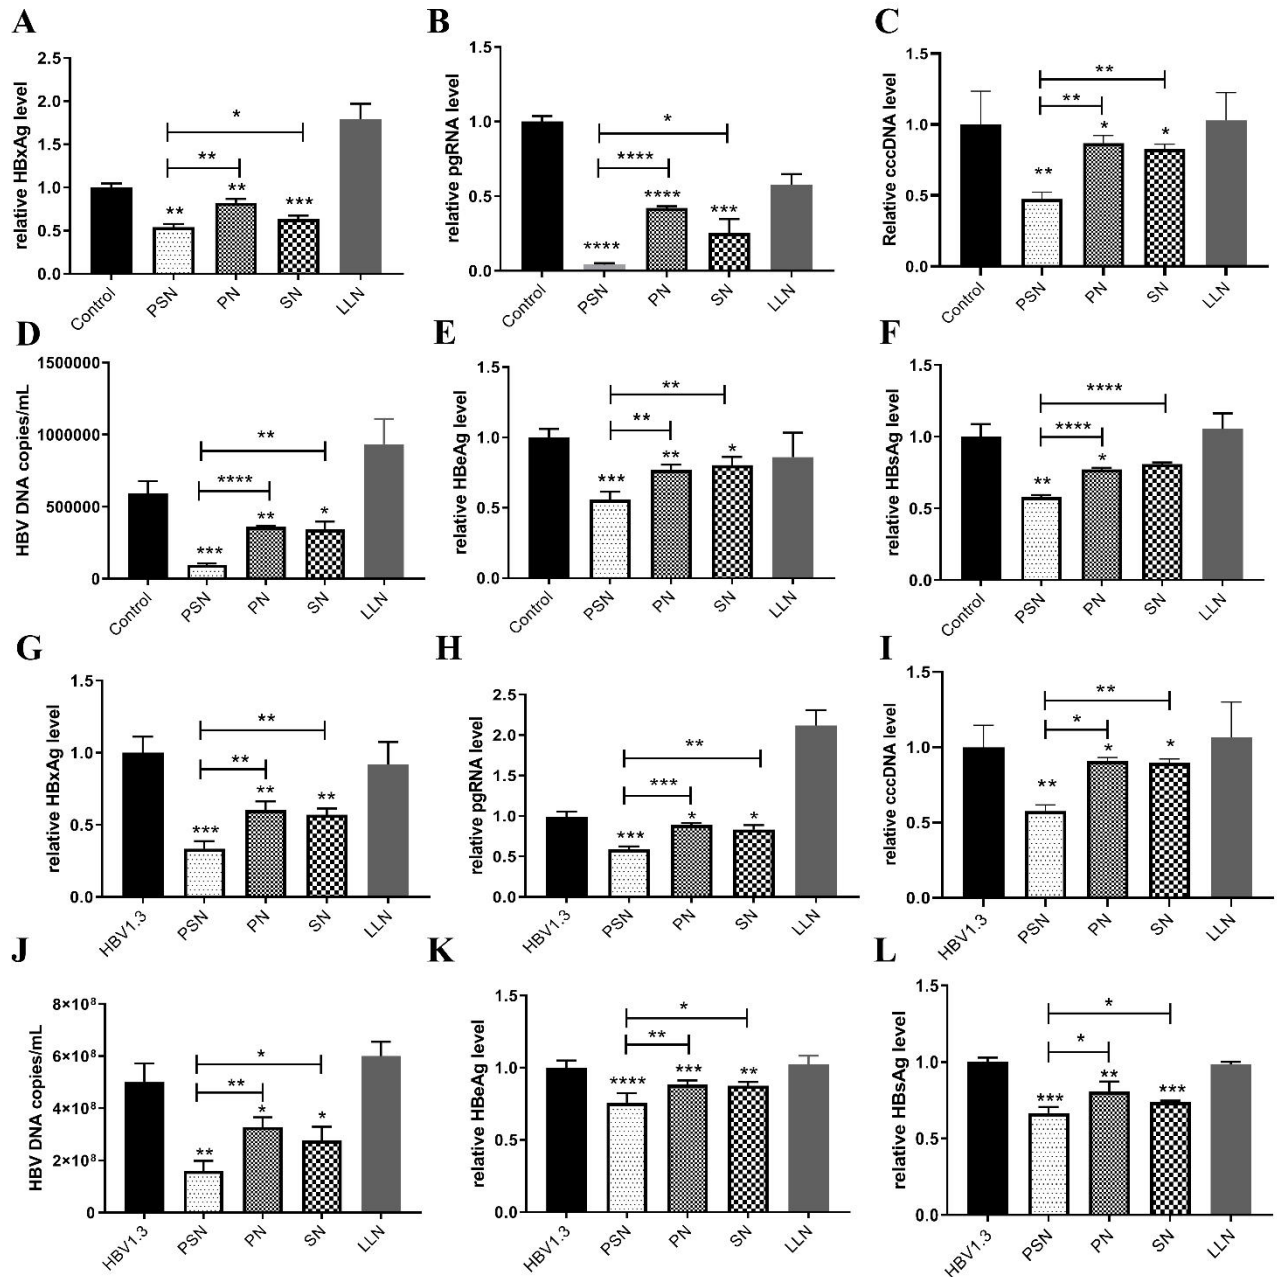

**Figure S3.** Effect of liposomal nanoparticles on the inhibition of HBV in HepG2.2.15 cells and pHBV1.3-HepG2. (A-C). Inhibitory effect of liposomal nanoparticles on HBxAg mRNA, pgRNA and cccDNA in HepG2.2.15 cells. (D-F). Inhibitory effect of liposomal nanoparticles on HBV DNA, HBeAg and HBsAg in supernatant of HepG2.2.15 cells. (G-I). Inhibitory effect of liposomal nanoparticles on HBxAg mRNA, pgRNA and cccDNA in pHBV1.3-HepG2 cells. (J-L). Inhibitory effect of liposomal nanoparticles on HBV DNA, HBeAg, and HBsAg in supernatant of pHBV1.3-

HepG2 cells. Data are represented as the mean  $\pm$  SD from at least three independent experiments.

\* $P < 0.05$ , \*\* $P < 0.01$ , \*\*\* $P < 0.001$ , \*\*\*\* $P < 0.0001$ .

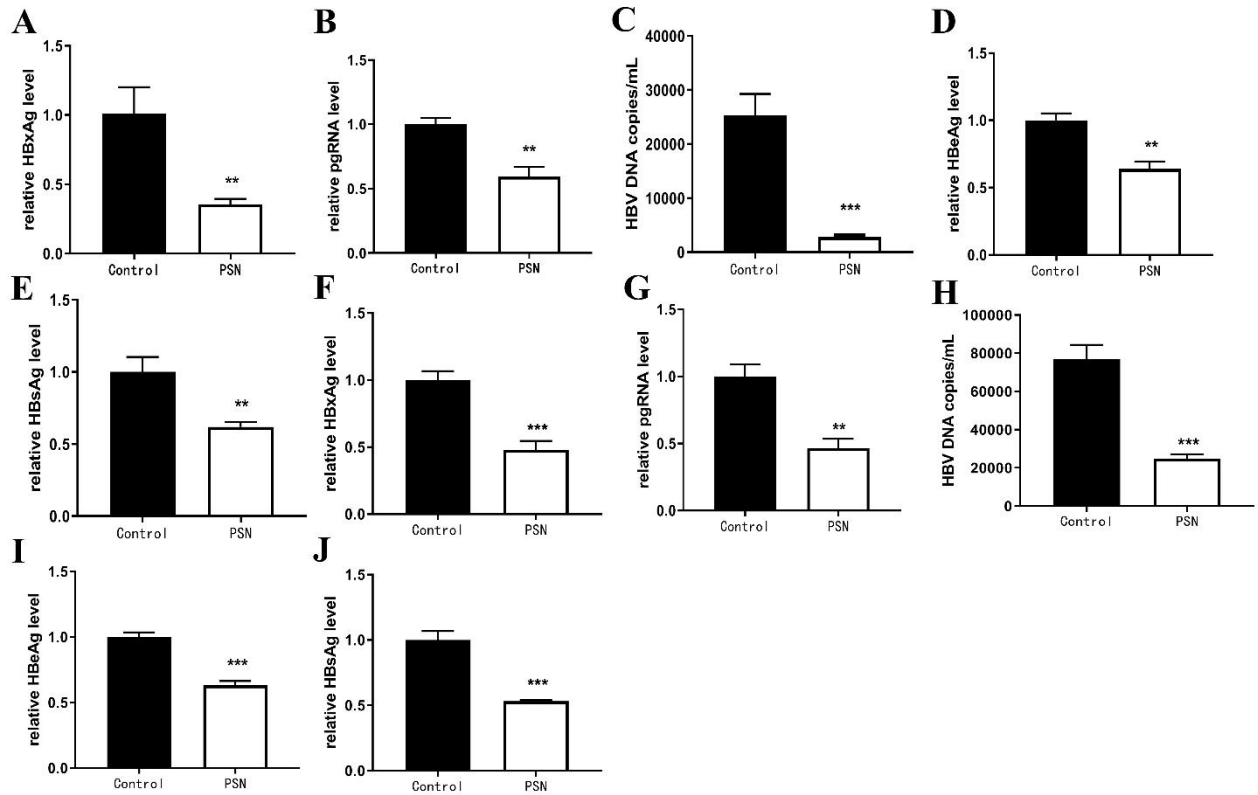

**Figure S4.** PSN inhibition of HBxAg, pgRNA, HBV DNA, HBeAg and HBsAg in HepG2-N6 cells before (A-E) and after HBV infection (F-J). Data are represented as the mean  $\pm$  SD from at least three independent experiments. \*\* $P < 0.01$ , \*\*\* $P < 0.001$ .

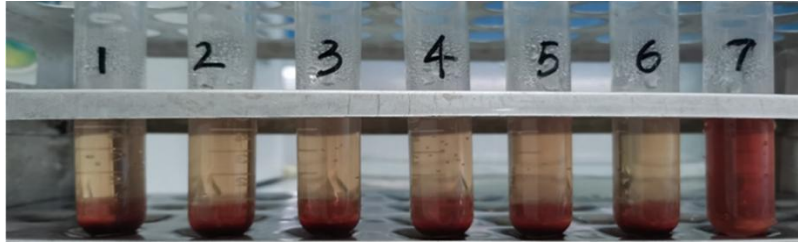

**Figure S5.** The results of the haemolytic assay. Tubes 1-6 are the erythrocyte suspension with 0, 0.1, 0.2, 0.4, 0.8, 1.6 mg/mL PSN, respectively; tube 7 is the erythrocyte suspension with distilled water.

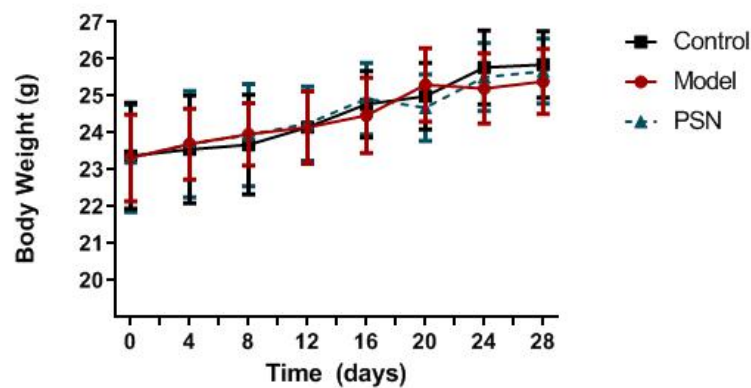

**Figure S6.** Average body weight during the modeling of hepatitis B mice and administration.

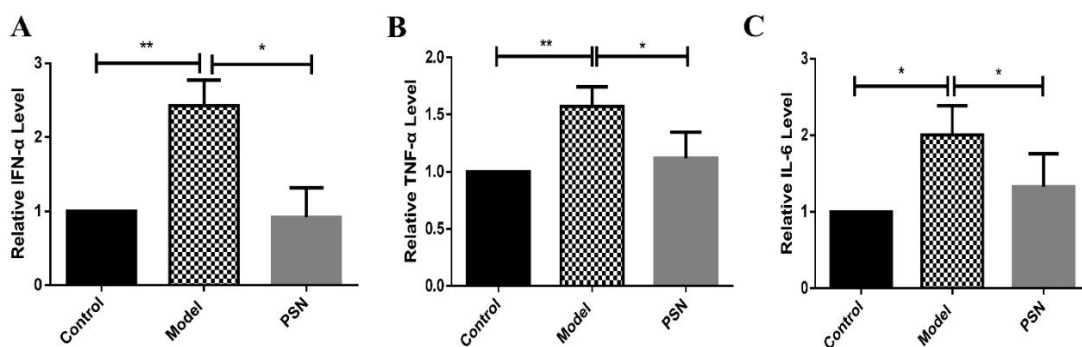

**Figure S7.** RT-qPCR analysis for the expression of cytokines IFN- $\alpha$  (A), TNF- $\alpha$  (B), and IL-6 (C) in mice's serum after PSN treatment. Data are representative of three independent experiments with  $n = 8$  mice per group. \* $P < 0.05$ , \*\* $P < 0.01$ .

**Table S1.** Primers for qPCR or RT-qPCR

| Primers           | Primer sequences                       |
|-------------------|----------------------------------------|
| HBxAg-F           | GTCTGTGCCTTCTCATCTGCC                  |
| HBxAg-R           | CTCAAGGTCGGTCGTTGACA                   |
| pgRNA-F           | GGAGTGCGAATCCCACTC                     |
| pgRNA-R           | AGAAGAACTCCCTCGCCTC                    |
| HBV-F             | ATACTGCACTCAGGCAAGC                    |
| HBV-R             | GCCTCGTCGTCTAACAAC                     |
| GAPDH-F           | GAAGGTGAAGGTCGGAGT                     |
| GAPDH-R           | CATGGGTGGAATCATATTGGAA                 |
| cccHBV-1519-F25   | 5'-ACGGGGCGCACCTCTCTTTACGCGG-3'        |
| cccHBV-1886-R25   | 5'-CAAGGCACAGCTTGGAGGCTTGAAC-3'        |
| cccHBV-1685-F20FM | 5'-(FAM)-AACGACCGACCTTGAGGCAT-(MGB)-3' |
| IL-6 F            | CTGCAAGAGACTTCCATCCAG                  |
| IL-6 R            | AGTGGTATAGACAGGTCTGTTGG                |
| TNF- $\alpha$ F   | CCGCGACGTGGAAGTGG                      |
| TNF- $\alpha$ R   | GGCCATTTGGGAAGTCTCAT                   |
| IFN- $\alpha$ F   | GAGGCCGTGCTGGTGCTCA                    |
| IFN- $\alpha$ R   | TGATTTCTGCTCTGACAACCTCCC               |
